# Supplementary material for: lncRNA Xist Regulates Osteoblast Differentiation by Sponging miR-19a-3p in Aging-induced Osteoporosis
Source: PubMed Central journal article supplement (PMC7505278; doi:10.14336/ad.2019.0724), 2020-10-01
Supplement: AD-11-5-1058-suppl.pdf [file AD-11-5-1058-suppl.pdf]

## **lncRNA Xist Regulates Osteoblast Differentiation by Sponging miR-19a-3p in Aging-induced Osteoporosis**

**Shijie Chen<sup>1,2</sup>, Yuezhan Li<sup>1</sup>, Shuang Zhi<sup>4</sup>, Zhiyu Ding<sup>1</sup>, Yan Huang<sup>5</sup>, Weiguo Wang<sup>1</sup>, Ruping Zheng<sup>6</sup>, Haiyang Yu<sup>6</sup>, Jianlong Wang<sup>1</sup>, Minghua Hu<sup>3</sup>, Jinglei Miao<sup>1\*</sup>, Jinsong Li<sup>1\*</sup>**

<sup>1</sup>Department of Orthopaedics, The Third Xiangya Hospital of Central South University, Changsha, China. <sup>2</sup>Shanghai Key Laboratory of Regulatory Biology, Institute of Biomedical Sciences and School of Life Sciences, East China Normal University, Shanghai, China. <sup>3</sup>Department of Anatomy, Histology and Embryology, Changsha Medical University, Changsha, China. <sup>4</sup>Four Gynecological Wards, Ningbo Women & Children's Hospital, Ningbo, Zhejiang, China. <sup>5</sup>The Second Xiangya Hospital of Central South University, Changsha, China. <sup>6</sup>School of Basic Medical Science, Central South University, Changsha, China.

## SUPPLEMENTARY DATA

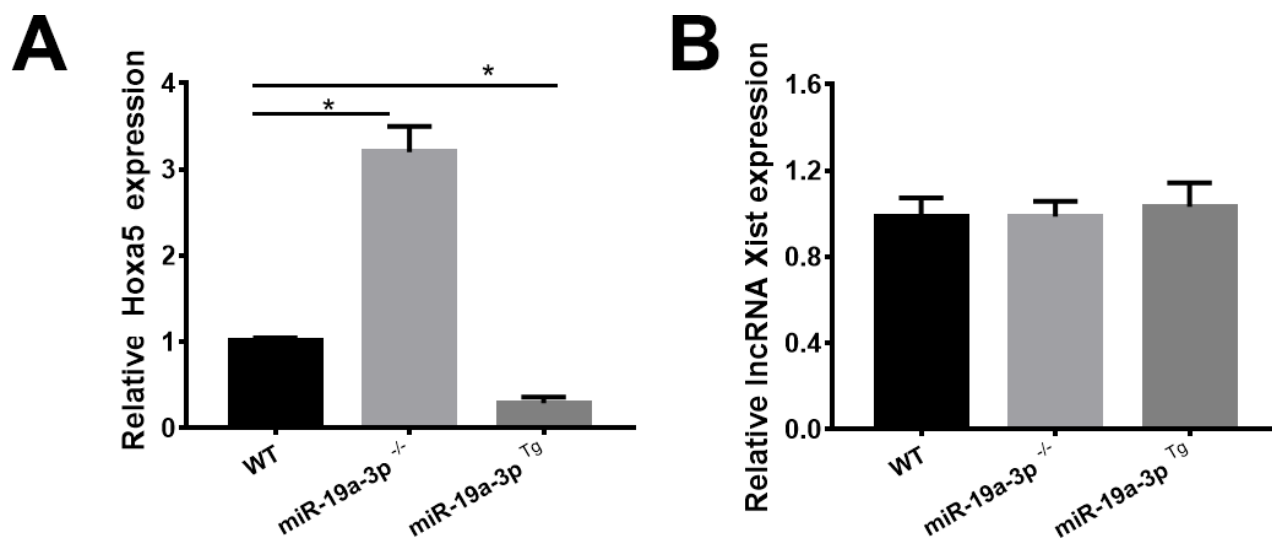

**Supplementary Figure 1. The expression of Hoxa5 and Xist in BMSCs from the miR-19a-3p tg and KO mice. (A)** The mRNA expression of Hoxa5 in BMSCs from the miR-19a-3p tg and KO mice. **(B)** The expression of Xist in BMSCs from the miR-19a-3p tg and KO mice. Data shown as mean  $\pm$  SD. \* $p < 0.05$ .
